# Supplementary material for: The PGI enzyme system and fitness response to temperature as a measure of environmental tolerance in an invasive species
Source: PeerJ. 2014 Nov 25;2:e676. doi: 10.7717/peerj.676 (PMC4250065; doi:10.7717/peerj.676)
Supplement: Supplemental Information 1 — Monitoring of larval weight and larval mortality, for two population of Costelytra zealandica (populations A and B) and one population of C. brunneum (population C), over a period of six weeks, under three different temperature regimes (10, 15 and 20 degrees). [file peerj-02-676-s001.xlsx]

## Sheet: C. zealandica popA 10-15-20°C
Larva ID	Initial weight	Week 1	Week 2	Week 3	Week 4	Week 5	Week 6
T1-P1-1	0.06	0.09	0.08	0.08	0.08	0.07	0.07
T1-P1-10	0.09	0.13	0.13	0.13	0.14	0.13	0.14
T1-P1-11	0.09	0.11	0.13	0.14	0.16	0.18	0.17
T1-P1-12	0.08	0.11	0.12	0.14	0.14	0.12	0.12
T1-P1-13	0.08	0.13	0.14	0.15	0.16	0.17	0.17
T1-P1-14	0.07	0.11	0.14	0.14	0.17	0.18	0.18
T1-P1-15	0.08	0.08	0.1	0.11	0.11	0.13	0.12
T1-P1-16	0.08	0.11	0.13	0.13	0.14	0.13	0.12
T1-P1-17	0.08	0.11	0.13	0.14	0.15	0.16	0.16
T1-P1-18	0.08	0.12	0.14	0.14	0.14	0.16	0.16
T1-P1-19	0.08	0.11	0.12	0.11	0.13	0.12	/
T1-P1-2	0.06	0.09	0.09	0.1	0.11	0.12	0.12
T1-P1-20	0.07	0.1	0.1	0.09	0.09	0.09	0.1
T1-P1-21	0.1	0.11	0.13	0.12	0.14	0.17	0.18
T1-P1-22	0.09	0.12	0.14	0.15	0.15	0.14	0.13
T1-P1-23	0.1	0.15	0.16	0.17	0.18	/	/
T1-P1-24	0.06	0.09	0.08	0.08	0.07	0.07	0.06
T1-P1-25	0.08	0.09	0.09	0.1	0.09	0.08	/
T1-P1-26	0.1	0.11	/	/	/	/	/
T1-P1-27	0.1	0.12	0.15	0.16	0.17	0.19	0.18
T1-P1-28	0.1	0.14	0.15	0.14	0.14	0.15	0.17
T1-P1-29	0.11	0.14	0.16	0.16	0.17	0.16	0.16
T1-P1-3	0.06	0.08	0.1	0.11	0.12	0.13	0.14
T1-P1-30	0.09	0.1	0.1	0.1	0.1	/	/
T1-P1-4	0.06	0.08	0.08	0.1	0.11	0.1	0.11
T1-P1-5	0.06	0.09	0.1	0.12	0.13	0.14	0.13
T1-P1-6	0.05	0.06	/	/	/	/	/
T1-P1-7	0.07	0.09	0.12	0.13	0.15	0.16	0.17
T1-P1-8	0.06	0.09	0.11	0.12	0.13	0.16	0.16
T1-P1-9	0.07	0.1	0.11	0.11	0.13	0.12	0.13
T2-P1-1	0.05	0.05	0.06	0.08	0.1	0.11	0.12
T2-P1-10	0.08	0.12	0.13	0.14	0.14	0.17	0.14
T2-P1-11	0.07	0.11	0.12	0.15	0.16	0.17	0.17
T2-P1-12	0.06	0.08	0.07	0.08	0.08	0.11	0.11
T2-P1-13	0.08	0.13	0.13	0.14	0.15	0.16	0.17
T2-P1-14	0.08	0.12	0.12	0.16	0.16	0.17	0.15
T2-P1-15	0.09	0.11	0.13	0.16	0.19	0.16	0.17
T2-P1-16	0.1	0.1	0.11	0.13	0.18	0.19	0.17
T2-P1-17	0.09	0.12	0.13	0.14	0.16	0.17	0.18
T2-P1-18	0.1	0.13	0.15	0.16	0.21	0.2	0.2
T2-P1-19	0.08	0.09	0.08	/	/	/	/
T2-P1-2	0.07	0.1	0.11	0.1	/	/	/
T2-P1-20	0.06	0.11	0.13	0.14	0.15	0.17	0.16
T2-P1-21	0.08	/	/	/	/	/	/
T2-P1-22	0.08	0.12	0.13	0.14	0.14	0.14	/
T2-P1-23	0.09	0.12	/	/	/	/	/
T2-P1-24	0.1	0.13	0.14	0.15	0.15	0.15	0.15
T2-P1-25	0.08	0.12	0.14	0.15	0.13	0.15	0.14
T2-P1-26	0.07	/	/	/	/	/	/
T2-P1-27	0.1	0.14	0.14	0.14	0.15	/	/
T2-P1-28	0.09	0.09	/	/	/	/	/
T2-P1-29	0.11	0.15	0.17	0.23	0.19	0.18	/
T2-P1-3	0.07	0.1	0.12	0.13	0.14	0.16	/
T2-P1-30	0.11	0.16	0.16	0.23	0.21	0.19	0.19
T2-P1-4	0.07	0.09	0.1	0.12	0.13	0.14	0.14
T2-P1-5	0.08	0.8	0.09	0.11	0.13	0.14	0.13
T2-P1-6	0.06	0.08	0.09	0.08	/	/	/
T2-P1-7	0.08	0.11	0.12	0.16	0.17	0.16	0.16
T2-P1-8	0.09	0.11	0.14	0.15	0.16	0.17	0.17
T2-P1-9	0.09	0.12	0.14	0.16	0.18	0.21	0.21
T3-P1-1	0.05	0.06	0.09	0.1	0.21	0.14	0.16
T3-P1-10	0.07	0.13	0.16	0.15	0.17	0.19	0.19
T3-P1-11	0.08	0.1	0.09	/	/	/	/
T3-P1-12	0.08	0.13	0.16	0.17	0.19	0.19	0.19
T3-P1-13	0.09	0.16	0.18	0.19	0.2	0.17	0.18
T3-P1-14	0.07	0.09	0.08	0.07	0.06	/	/
T3-P1-15	0.08	0.14	0.16	0.16	0.14	0.14	0.12
T3-P1-16	0.11	0.15	0.15	0.13	0.12	0.13	0.15
T3-P1-17	0.08	0.13	0.16	0.16	0.18	0.17	0.14
T3-P1-18	0.09	0.16	0.18	0.16	0.15	0.15	0.14
T3-P1-19	0.07	0.13	0.13	0.12	0.11	/	/
T3-P1-2	0.08	/	/	/	/	/	/
T3-P1-20	0.08	0.13	0.14	0.11	/	/	/
T3-P1-21	0.09	0.16	0.18	0.2	0.23	/	/
T3-P1-22	0.09	0.14	0.15	0.15	0.16	0.15	/
T3-P1-23	0.1	0.17	0.18	0.18	0.2	0.18	0.2
T3-P1-24	0.1	0.16	0.16	0.16	0.16	0.16	0.18
T3-P1-25	0.1	0.16	0.18	0.19	0.2	0.2	0.17
T3-P1-26	0.11	0.17	0.19	0.18	0.21	0.21	0.22
T3-P1-27	0.1	0.17	0.19	0.22	0.22	0.23	0.21
T3-P1-28	0.11	0.17	0.17	0.19	0.21	0.2	0.2
T3-P1-29	0.13	0.19	0.18	0.2	0.21	0.2	0.19
T3-P1-3	0.07	0.12	0.13	0.15	0.16	0.17	0.17
T3-P1-30	0.11	0.17	0.19	0.2	0.21	0.19	0.17
T3-P1-4	0.06	0.11	0.13	0.14	0.16	0.18	0.16
T3-P1-5	0.05	0.11	0.14	0.16	0.18	0.2	0.18
T3-P1-6	0.06	0.11	0.15	0.17	0.18	0.2	0.2
T3-P1-7	0.08	0.15	0.17	0.19	0.2	0.18	0.19
T3-P1-8	0.08	0.13	0.13	0.12	0.11	0.11	0.08
T3-P1-9	0.07	0.11	0.14	0.18	0.18	0.19	0.2
T1	treatment 1 10°C
T2	treatment 2 15°C
T3	treatment 3 20°C
/	larva died

## Sheet: C. zealandica popB 10-15-20°C
Larva ID	Initial weight	Week 1	Week 2	Week 3	Week 4	Week 5	Week 6
T1-P2-1	0.07	0.1	0.11	0.12	0.14	0.13	0.15
T1-P2-10	0.09	0.12	0.12	0.14	0.13	0.14	0.13
T1-P2-11	0.08	0.09	0.1	0.1	0.12	0.12	0.13
T1-P2-12	0.09	0.12	0.13	0.14	0.15	0.15	0.16
T1-P2-13	0.08	0.12	0.13	0.14	0.17	0.13	0.14
T1-P2-14	0.09	0.13	0.13	0.15	0.15	0.15	0.15
T1-P2-15	0.08	0.08	0.07	0.08	0.08	0.08	0.07
T1-P2-16	0.09	0.1	0.12	0.13	0.13	0.14	0.14
T1-P2-17	0.09	0.13	0.13	0.14	0.16	0.15	0.15
T1-P2-18	0.09	0.09	0.09	0.12	0.13	0.14	0.13
T1-P2-19	0.09	0.11	0.11	0.12	0.12	0.12	0.13
T1-P2-2	0.08	0.11	0.12	0.15	0.16	0.14	0.14
T1-P2-20	0.09	0.12	0.12	0.14	0.15	0.17	0.15
T1-P2-21	0.09	0.09	0.1	0.09	0.09	0.09	0.09
T1-P2-22	0.08	0.09	0.09	0.09	0.09	0.09	0.09
T1-P2-23	0.08	0.11	0.12	0.14	0.15	0.14	0.15
T1-P2-24	0.09	0.11	0.12	0.13	0.14	0.13	0.14
T1-P2-25	0.11	0.13	0.13	0.14	0.13	0.12	0.12
T1-P2-26	0.1	0.15	0.13	0.15	0.17	0.15	0.14
T1-P2-27	0.1	0.12	0.13	0.14	0.13	0.13	0.13
T1-P2-28	0.11	0.12	0.14	0.15	0.16	0.16	0.16
T1-P2-29	0.11	0.15	0.15	0.16	0.16	0.16	0.16
T1-P2-3	0.08	0.1	0.1	0.11	0.1	0.11	0.11
T1-P2-30	0.1	0.14	0.13	0.13	0.12	0.12	0.12
T1-P2-4	0.09	0.11	0.13	0.14	0.14	0.12	0.12
T1-P2-5	0.07	0.08	0.09	0.1	0.11	0.11	0.14
T1-P2-6	0.07	0.11	0.12	0.14	0.15	0.14	0.14
T1-P2-7	0.08	0.12	0.14	0.16	0.15	0.15	0.18
T1-P2-8	0.07	0.11	0.11	0.13	0.15	0.14	0.15
T1-P2-9	0.07	0.1	0.1	0.12	0.11	0.11	0.12
T2-P2-1	0.07	0.08	0.08	0.08	0.07	0.07	/
T2-P2-10	0.09	0.1	0.11	0.12	0.12	0.13	0.12
T2-P2-11	0.09	0.13	0.13	0.14	0.15	0.14	0.13
T2-P2-12	0.08	0.12	0.12	0.12	0.14	0.14	0.13
T2-P2-13	0.09	0.11	0.12	0.12	0.11	0.11	0.12
T2-P2-14	0.08	0.11	0.11	0.13	0.13	0.13	0.14
T2-P2-15	0.07	0.12	0.11	0.14	0.14	0.13	0.15
T2-P2-16	0.09	0.13	0.15	0.16	0.17	0.16	0.17
T2-P2-17	0.09	0.13	0.14	0.15	0.15	0.14	0.14
T2-P2-18	0.08	0.12	0.13	0.15	0.15	0.14	0.16
T2-P2-19	0.09	0.13	0.13	0.12	0.15	0.14	0.15
T2-P2-2	0.07	0.1	0.11	0.11	0.1	0.1	0.1
T2-P2-20	0.08	0.09	0.09	0.1	0.1	0.11	/
T2-P2-21	0.11	0.13	0.15	0.17	0.19	0.16	0.17
T2-P2-22	0.1	0.12	0.12	0.15	0.15	0.15	0.15
T2-P2-23	0.1	0.09	0.1	0.1	0.1	0.09	0.09
T2-P2-24	0.1	0.13	0.12	0.13	0.12	0.12	0.12
T2-P2-25	0.1	0.14	0.15	0.13	0.14	0.15	0.14
T2-P2-26	0.11	0.16	0.17	0.15	0.15	0.13	0.13
T2-P2-27	0.08	0.09	0.12	0.08	0.08	/	/
T2-P2-28	0.1	0.14	0.18	0.14	0.13	0.13	0.13
T2-P2-29	0.11	0.13	0.21	0.15	0.17	0.14	0.14
T2-P2-3	0.07	0.11	0.14	0.13	0.13	0.13	0.13
T2-P2-30	0.09	0.1	0.12	0.14	0.15	0.15	0.14
T2-P2-4	0.08	0.12	0.11	0.11	0.11	0.11	0.1
T2-P2-5	0.07	0.07	0.09	0.09	0.09	0.08	0.09
T2-P2-6	0.08	0.11	0.12	0.12	0.12	0.12	0.13
T2-P2-7	0.07	0.1	0.11	0.12	0.11	0.11	0.11
T2-P2-8	0.08	0.11	0.12	0.11	0.12	0.12	0.12
T2-P2-9	0.07	0.1	0.1	0.1	0.12	0.11	0.11
T3-P2-1	0.08	0.13	0.15	0.15	0.16	0.17	0.14
T3-P2-10	0.08	0.09	0.11	0.1	0.09	0.1	0.1
T3-P2-11	0.07	0.13	0.14	0.15	0.14	/	/
T3-P2-12	0.08	0.12	0.12	0.12	0.14	0.14	0.15
T3-P2-13	0.09	0.15	0.17	0.19	0.19	0.17	0.15
T3-P2-14	0.08	0.08	0.07	0.08	/	/	/
T3-P2-15	0.08	/	/	/	/	/	/
T3-P2-16	0.09	0.12	0.13	0.13	0.14	0.13	0.12
T3-P2-17	0.09	0.13	0.13	0.14	0.13	0.12	0.11
T3-P2-18	0.1	0.14	0.13	/	/	/	/
T3-P2-19	0.09	0.14	0.15	0.16	0.15	0.16	0.17
T3-P2-2	0.08	0.13	0.14	0.16	0.16	0.15	0.16
T3-P2-20	0.09	0.13	0.13	0.13	0.12	0.11	0.1
T3-P2-21	0.09	/	/	/	/	/	/
T3-P2-22	0.09	0.15	0.17	0.2	0.21	0.21	0.21
T3-P2-23	0.09	0.1	0.11	0.11	0.1	0.09	0.06
T3-P2-24	0.08	0.12	0.13	0.14	0.13	0.13	0.12
T3-P2-25	0.1	0.16	0.15	0.16	0.14	0.13	/
T3-P2-26	0.09	0.14	0.15	0.17	0.17	0.16	0.17
T3-P2-27	0.09	0.15	0.16	0.19	0.18	0.16	0.15
T3-P2-28	0.09	0.15	0.16	0.18	0.17	0.14	0.17
T3-P2-29	0.1	0.15	0.16	0.17	0.18	0.16	0.16
T3-P2-3	0.08	0.13	0.15	0.18	0.17	0.15	0.16
T3-P2-30	0.09	0.11	0.12	/	/	/	/
T3-P2-4	0.08	0.11	0.13	0.16	0.14	0.15	0.18
T3-P2-5	0.07	0.12	0.11	0.14	0.14	0.13	0.11
T3-P2-6	0.07	0.13	0.14	0.15	0.15	0.15	0.15
T3-P2-7	0.08	0.13	0.14	0.17	0.18	0.16	0.18
T3-P2-8	0.08	0.12	0.14	0.16	0.16	0.13	0.14
T3-P2-9	0.07	0.13	0.12	0.12	0.13	0.12	0.12
T1	treatment 1 10°C
T2	treatment 2 15°C
T3	treatment 3 20°C
/	larva died

## Sheet: C. brunneum 10-15 and 20°C
Larva ID	Initial weight	Week 1	Week 2	Week 3	Week 4	Week 5	Week 6
T1-PBr-1	0.04	0.06	0.08	0.08	0.1	0.11	0.12
T1-PBr-10	0.14	0.18	0.2	/	/	/	/
T1-PBr-2	0.09	0.11	0.13	0.12	0.12	0.12	0.14
T1-PBr-3	0.1	0.1	0.11	/	/	/	/
T1-PBr-4	0.13	0.13	0.15	0.15	0.16	0.17	0.16
T1-PBr-5	0.14	0.17	0.19	0.19	0.19	0.21	0.21
T1-PBr-6	0.09	0.11	0.12	0.14	0.17	0.17	0.16
T1-PBr-7	0.12	0.13	0.14	0.16	0.18	0.2	0.19
T1-PBr-8	0.15	0.16	0.2	0.2	0.21	0.22	0.21
T1-PBr-9	0.15	0.15	0.16	0.18	0.19	0.21	0.21
T2-PBr-1	0.06	0.1	0.13	0.16	0.19	0.2	0.21
T2-PBr-10	0.15	0.18	0.22	0.24	0.23	0.26	0.27
T2-PBr-2	0.09	0.11	0.14	0.15	0.15	0.15	0.16
T2-PBr-3	0.09	0.1	0.11	0.13	0.16	0.15	0.16
T2-PBr-4	0.11	0.13	0.16	0.16	0.17	0.16	0.16
T2-PBr-5	0.11	0.18	0.18	0.18	0.2	0.19	0.2
T2-PBr-6	0.09	0.1	0.12	0.17	0.17	0.18	0.19
T2-PBr-7	0.12	0.18	0.18	0.2	0.2	0.2	0.21
T2-PBr-8	0.09	/	/	/	/	/	/
T2-PBr-9	0.16	0.2	0.22	0.2	0.2	0.22	0.22
T3-PBr-1	0.07	0.09	0.1	/	/	/	/
T3-PBr-2	0.11	0.15	0.18	0.18	0.18	0.17	0.14
T3-PBr-3	0.11	0.18	0.19	0.2	0.2	0.2	0.2
T3-PBr-4	0.11	0.15	0.16	0.16	0.16	0.14	0.15
T3-PBr-5	0.13	0.19	0.19	0.19	0.2	0.2	0.19
T3-PBr-6	0.14	0.2	0.2	0.19	0.2	0.19	0.18
T3-PBr-7	0.14	0.18	0.18	0.14	0.09	0.08	0.1
T3-PBr-8	0.16	0.18	0.19	0.2	0.21	0.19	0.2
T3-PBr-9	0.13	/	/	/	/	/	/
T3-PBr10	0.16	0.19	0.22	0.22	0.22	0.22	0.22
T1	treatment 1 10°C
T2	treatment 2 15°C
T3	treatment 3 20°C
/	larva died
